# Supplementary material for: Innovative fluorescence sensing platform for β-lactams based on acidity/basicity-sensitive graphdiyne quantum dots
Source: Royal Society of Chemistry journal article supplement (doi:10.1039/d4cc03927k), 2024-01-01
Supplement: d4cc03927k1.pdf [file d4cc03927k1.pdf]

## Supporting information

### **Innovative fluorescence sensing platform for $\beta$ -lactams based on acidity/basicity-sensitive graphdiyne quantum dots**

Gangbing Zhu,<sup>a,d</sup> Diyan Liao,<sup>a</sup> Jing Li,<sup>a</sup> Yinhui Yi<sup>a,b,c\*</sup>

<sup>a</sup> School of the Environment and Safety Engineering, and Collaborative Innovation Center of Technology and Material of Water Treatment, Jiangsu University, Zhenjiang, 212013, PR China.

E-mail: yyh1108@ujs.edu.cn.

<sup>b</sup> Fujian Key Laboratory of Agro-products Quality & Safety, Fuzhou, 350003, PR China

<sup>c</sup> Key Laboratory of Agricultural Monitoring and Early Warning Technology, Ministry of Agriculture and Rural Affairs, P.R.China

<sup>d</sup> Fujian Key Laboratory of Inspection and Quarantine Technology Research, PR Chin

---

\*Corresponding author.  
E-mail address: yyh1108@ujs.edu.cn.

## **Experimental**

### **Reagents and instruments**

Hexa[(trimethylsilyl)ethynyl] benzene (HEB-TMS) and CuCl were purchased from Bide Pharmaceutical Technology Co., Ltd. N,N-dimethylformamide (DMF), tetrahydrofuran (THF), basic fuchsin, dichloromethane (DCM), methanol, PeG, ampicillin, amoxicillin, doxycycline, metronidazole, chloramphenicol, fluconazole, ciprofloxacin and  $\beta$ -lactamases were obtained from Macklin Biochemical Technology Co., Ltd. All the used solutions were prepared with ultrapure water.

(18.2 M $\Omega$  cm)

### **Preparation of S-GDY QDs**

Before preparing S-GDY QDs, the pure GDY nanosheets were synthesized according to the previous report (Angewandte Chemie International Edition, 2022, 61, e202210242) with minor modifications. The specific processes are list as follows: (a) 30 mg HEB-TMS and 5 mg CuCl were added into a glass bottle containing 6.0 mL DMF, heated in an oven to 60 °C for 24 h; (b) The mixtures were successively washed with DMF, DCM, THF and methanol, obtaining a black-brown powder (CuO/GDY) upon drying in a vacuum oven; (c) after treating CuO/GDY with 0.5 M HCl, the pure GDY can be obtained via filtration and drying.

Next, the as-proposed S-GDY QDs was synthesized through a simple one-pot hydrothermal method. In brief, a 20 mL of mixed solution containing basic fuchsin (4 mg) and GDY (20 mg) was transferred to a 50 mL Teflon equipped stainless steel autoclave for heating at 200 °C (8 h). Then, by filtering and dialyzing the resulted transparent yellow solution to remove the excess reactants, S-GDY QDs can be obtained. For comparison, the common GDY QDs without the acidity/basicity-sensitive capability was also prepared in the absence of basic fuchsin with similar method.

### **Smartphone coupled with test strips for $\beta$ -LA detection**

Firstly, the test strips were obtained by cutting the filter paper into  $4 \times 1$ cm and the S-GDY QDs solution were sprayed onto the strips evenly. Afterward,  $\beta$ -lactamases and different concentrations of  $\beta$ -LA were incubated for 30 minutes before being placed on test strips. Upon reacting for 5 min, the color change of the strips were captured by the smartphone, which were then analyzed via the Color Discrimination APP for the quantitative detection.

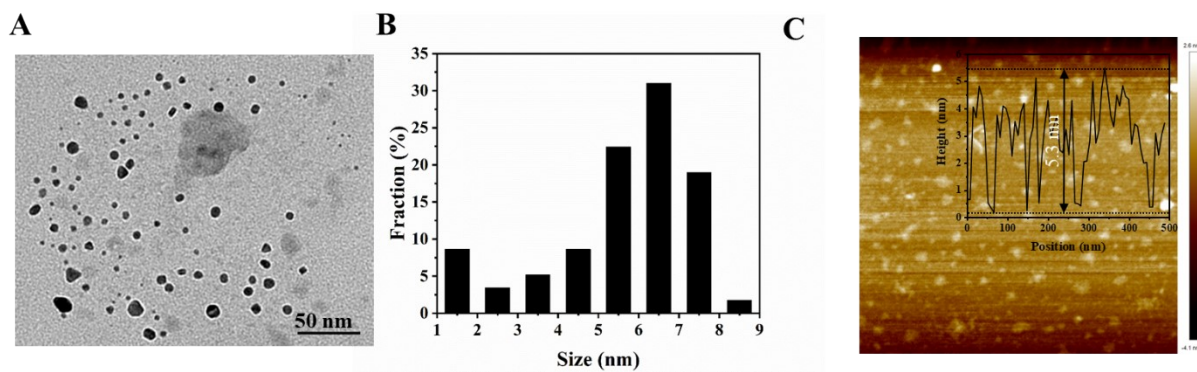

**Figure S1.** The (A) TEM, (B) size distribution and (C) AFM image of GDY QDs.

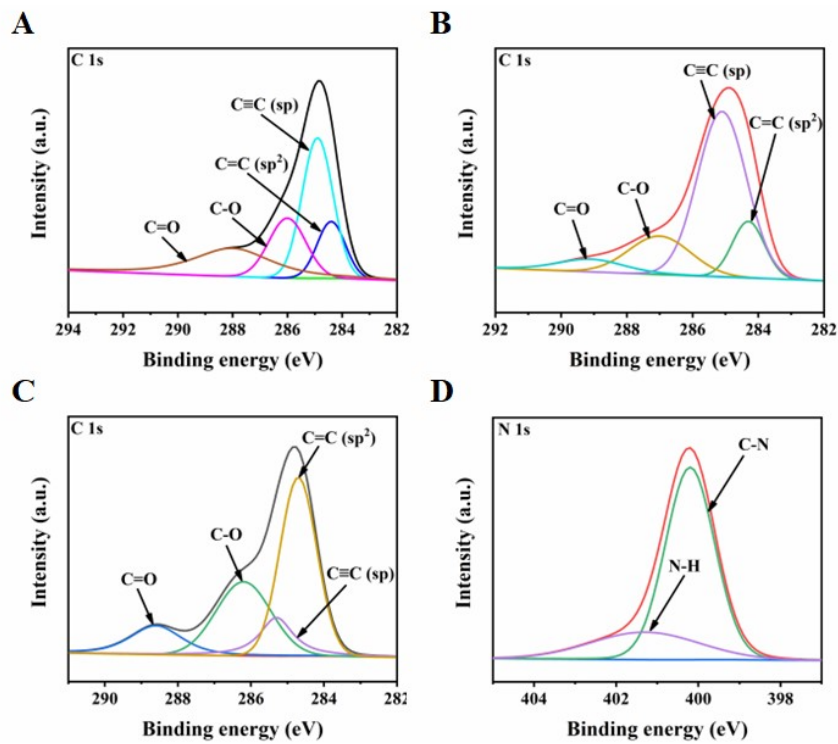

**Figure S2.** High-resolution C 1s spectra of (A) GDY, (B) GDY QDs and (C) S-GDY QDs. (D) High-resolution N 1s spectra of S-GDY QDs.

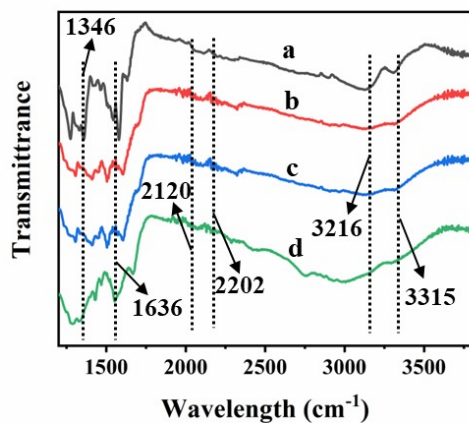

**Figure S3.** The FT-IR spectrum of (a) basic fuchsin, (b) GDY and (c) GDY QDs (d) S-GDY QDs.

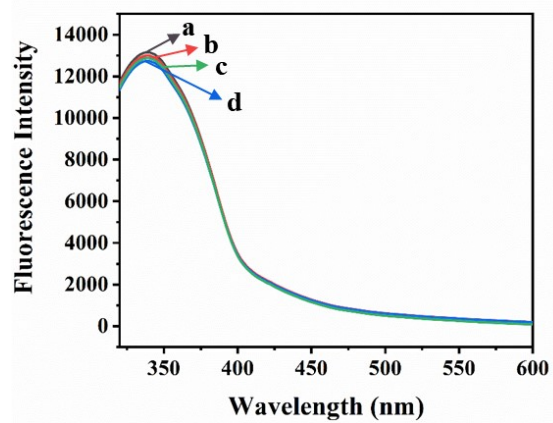

**Figure S4.** The fluorescent spectra of (a) GDY QDs, (b) GDY QDs + PeG +  $\beta$ -lactamases, (c) GDY QDs + PeG, (d) GDY QDs +  $\beta$ -lactamases.

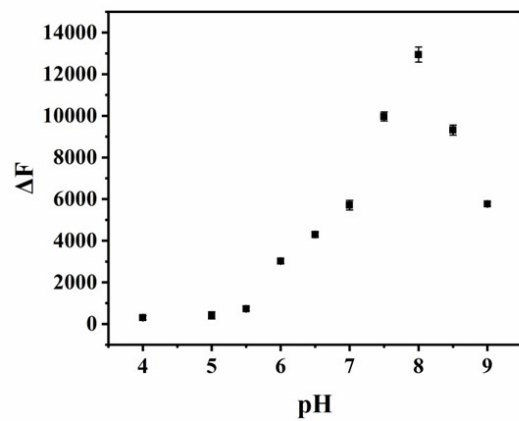

**Figure S5.** The effect from the pH value of the sensing system.



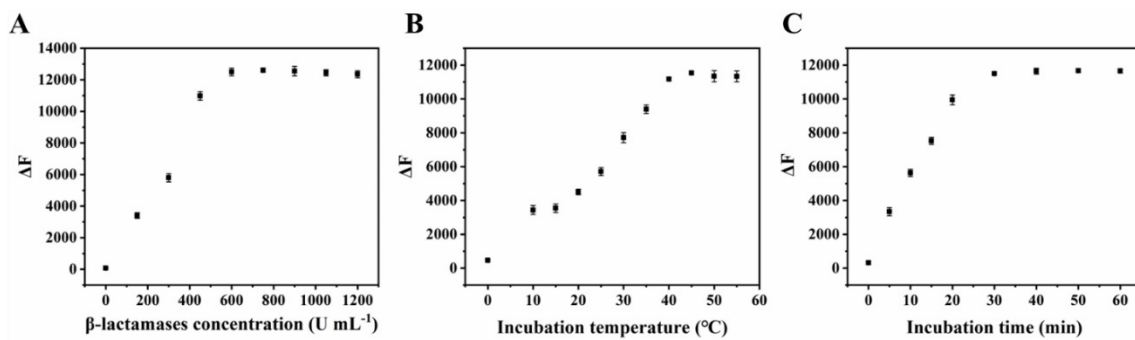

**Figure S6.** The effect from the (A)  $\beta$ -lactamases concentration, (B) incubation temperature and (C) incubation time.

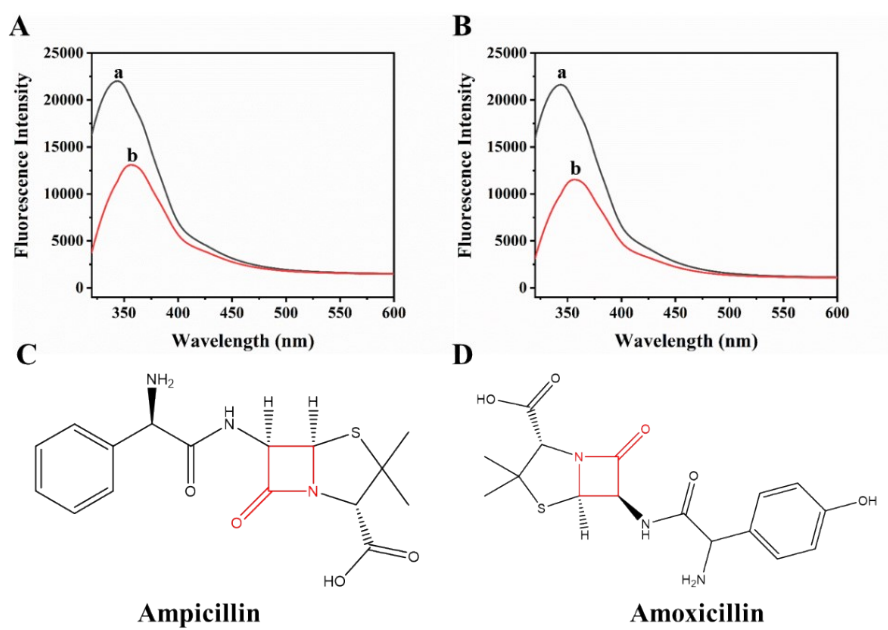

**Figure S7.** The fluorescent response of S-GDY QDs sensing system in the absence (a) and presence (b) of ampicillin (A) and amoxicillin (B); the chemical structure of ampicillin (C) and amoxicillin (D).

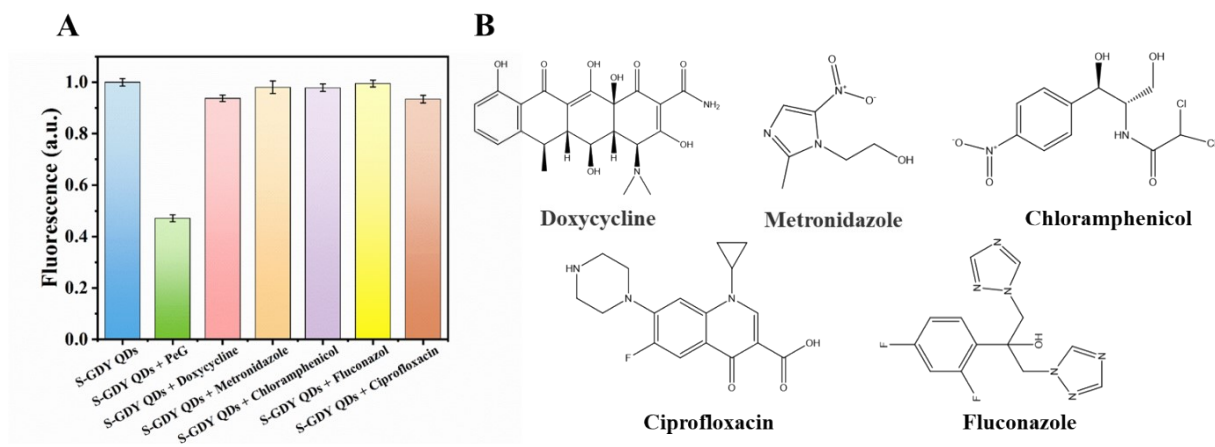

**Figure S8.** (A) The selectivity of S-GDY QDs for non- $\beta$ -LA detection and (B) the chemical structures of five non- $\beta$ -LA molecules.

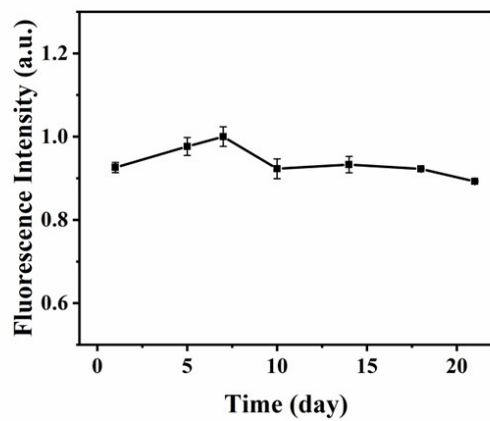

**Figure S9.** The fluorescence stability of S-GDY QDs.

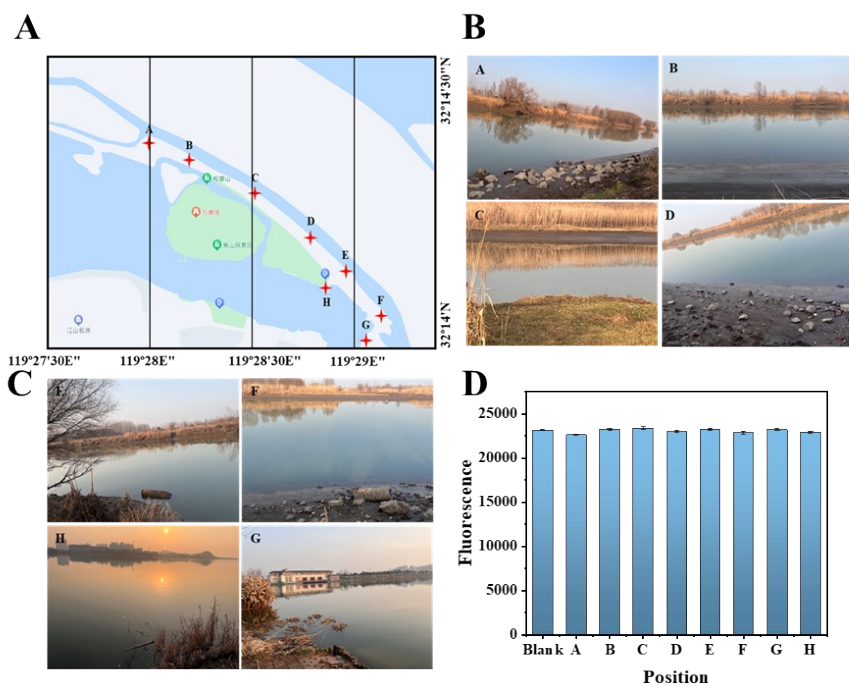

**Figure S10.** (A) Design of actual water sampling sites in the Changjiang River; (B) and (C) Photo of the corresponding location of the water sample point. (D) The fluorescence value of the sampling points shown.

**Table S1.** The detection results of PeG in real samples by the standard addition method (n=3).

| Samples | Spiked (nM) | Detection (nM) | Recovery (%) | RSD (%) |
|---------|-------------|----------------|--------------|---------|
| water   | 0           | 0              | -            | -       |
|         | 200         | 195.6          | 97.8         | 3.31    |
|         | 300         | 304.7          | 101.6        | 2.19    |
|         | 500         | 506.8          | 101.4        | 1.48    |
| Soil    | 0           | 0              | -            | -       |
|         | 200         | 201.0          | 100.5        | 4.97    |
|         | 300         | 309.5          | 103.2        | 3.50    |
|         | 500         | 497.3          | 99.5         | 1.41    |
